# Supplementary material for: Fe-Co Co-Doped 1D@2D Carbon-Based Composite as an Efficient Catalyst for Zn–Air Batteries
Source: MDPI journal article supplement (doi:10.3390/molecules29102349), 2024-05-16
Supplement: s1 [file s1]

---

## Supplementary materials

# Fe-Co Co-Doped 1D@2D Carbon-Based Composite as an Efficient Catalyst for Zn–Air Batteries

Ziwei Deng <sup>1</sup>, Wei Liu <sup>2</sup>, Junyuan Zhang <sup>1</sup>, Shuli Bai <sup>1</sup>, Changyu Liu <sup>1</sup>, Mengchen Zhang <sup>1</sup>, Chao Peng <sup>1</sup>, Xiaolong Xu <sup>1,\*</sup> and Jianbo Jia <sup>1,\*</sup>

<sup>1</sup> Jiangmen Key Laboratory of Synthetic Chemistry and Cleaner Production, School of Environmental and Chemical Engineering, Carbon Neutrality Innovation Center, Wuyi University, Jiangmen 529020, China

<sup>2</sup> Jiangmen Customs District Technology Center, Jiangmen 529020, China

\* Correspondence: xuxl@wyu.edu.cn (X.X.); jbjagu@163.com (J.J.)

---

### Sample Characterization

The X-ray powder diffraction (XRD) patterns were tested on the Bruker D8 ADVANCE A25X diffractometer by using Cu K $\alpha$  radiation ( $\lambda = 0.15406$  nm). The morphological features of the samples were tested using a scanning electron microscope (SEM, GeminiSEM 300 German). TEM (TEM, FEI Talos-F200S, US) obtained clearer internal morphology and structure of carbon nanotubes and carbon nanosheets. The Brunel–Emmett–Taylor (BET) surface area and pore size distribution of Fe<sub>x</sub>Co@NC-T were recorded and computed using an automated surface area and pore size analyzer (Micromeritics ASAP 2460, VacPrep 061, USA). The surface elements and valence were determined using an X-ray photoelectron spectroscopy (XPS) analyzer (Thermo Scientific K-Alpha, USA), and the obtained spectra were also compared with the carbon peak (284.8 eV) of the carbon monomer calibration. Raman spectrum was obtained at room temperature using a WITec alpha300R with an excitation wavelength of 532 nm. The metal content was tested with an Agilent CrossLab 4210 microwave plasma atomic emission spectrometer (MP-AES, USA) with emission wavelengths of Fe: 371.993 nm, Co: 340.512 nm, and Zn: 213.857 nm, respectively.

### Electrochemical Test

All electrochemical tests were performed on a CHI760E electrochemical workstation with the conventional three-electrode system, i.e., a catalyst-loaded glassy carbon electrode as the working electrode, an Ag/AgCl (saturated KCl) electrode as the reference electrode, and a graphite rod as the counter electrode. The prepared electrocatalyst or commercially available 20 wt.% Pt/C was dispersed in 2.0 mL of mixture of water: isopropanol: naphthol = 21:21:0.075 (V/V), sonicated for 1.5 h, and then dropped onto the glassy carbon electrode and dried under an infrared lamp. The ring-disk electrode has a ring electrode area of 0.188 cm<sup>2</sup> and a disk electrode area of 0.126 cm<sup>2</sup>. The loading of the prepared electrocatalyst in the ORR test was 1.0 mg cm<sup>-2</sup>, and the loading of the commercially available Pt/C was 25  $\mu$ g<sub>Pt</sub> cm<sup>-2</sup>. The ORR tests in alkaline media were performed in 0.10 M KOH saturated with O<sub>2</sub>. The Rotating ring-disk electrode (RRDE) techniques were performed on a Model RRDE-3A Apparatus (ALS, Japan) in the potential range of 1.162 ~ 0.162 V (vs. reversible hydrogen electrode, RHE) at a sweep speed of 5 mV s<sup>-1</sup>, and the ring potential was 1.162 V in alkaline media, respectively. All the potential conversion equation is  $E$  (vs. RHE) =  $E$  (vs. Ag/AgCl) + 0.059pH + 0.197 V.

The formula for H<sub>2</sub>O<sub>2</sub> yield (H<sub>2</sub>O<sub>2</sub>%) and electron transfer ( $n$ ) is as follows:

$$\text{H}_2\text{O}_2\% = \frac{200 \frac{I_r}{N}}{I_d + \frac{I_r}{N}} \quad (1)$$

$$n = \frac{4I_d}{I_d + \frac{I_r}{N}} \quad (2)$$

Where N is the current collection efficiency (calculated as 0.44),  $I_d$  and  $I_r$  are the disk and ring currents, respectively.

The ORR linear sweep voltammetry (LSV) curves at various speeds were recorded to calculate n based on the Kentucky–Levich equation in the ORR process.

$$\frac{1}{J} = \frac{1}{J_L} + \frac{1}{J_K} = \frac{1}{B\omega^{1/2}} + \frac{1}{J_K} \quad (3)$$

$$B = 0.2nFC_0(D_0)^{2/3}V^{1/6} \quad (4)$$

### Zn–Air Battery Assembly and Testing

To assemble the Zn–air battery, a polished zinc plate (0.3 mm of thickness) was used as the anode; an air electrode coated with 1.25 mL catalyst ink of Fe<sub>1</sub>Co–HNC-1000 or a mixture of 20 wt% Pt/C + RuO<sub>2</sub> (1:1 in a mass ratio) onto a carbon paper (electrode area: 12.5 cm<sup>2</sup>; catalyst loading: 0.10 mg cm<sup>−2</sup>). The air electrode was dried to form a uniform catalyst layer. In total, 6.0 M KOH with 0.20 M zinc acetate was used as the electrolyte for the rechargeable Zn–air batteries. The time for each charge and discharge in a cycle is 500 s. The potential–current polarization curves for the batteries were recorded on a CHI 660E workstation.

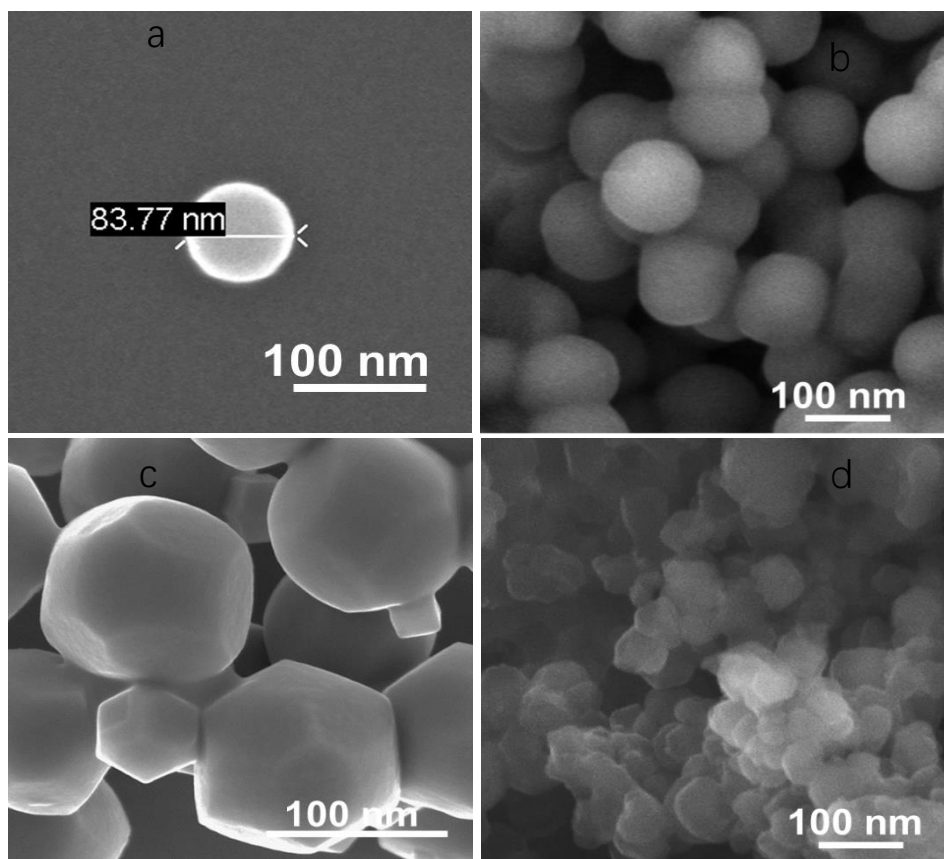

**Figure S1.** SEM images of (a)  $\text{SiO}_2$ , (b) PP- $\text{SiO}_2$ , (c) Fe/Co/Zn-ZIF-8/ZIF-67 without the addition of ammonia, and (d) Fe/Co/Zn-ZIF-8/ZIF-67 with the addition of ammonia.

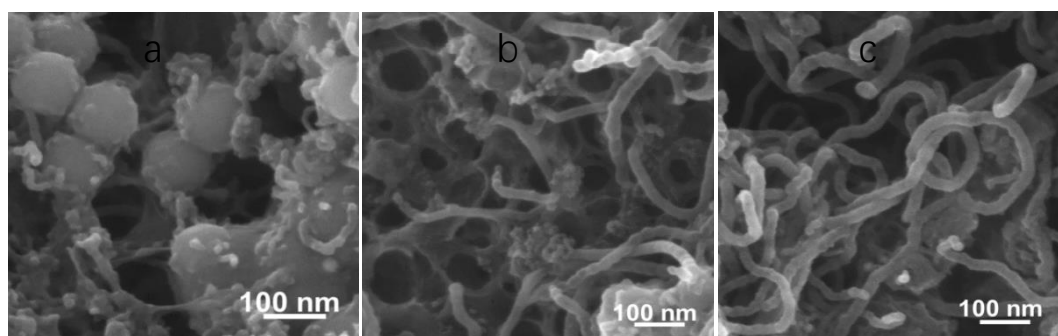

**Figure S2.** SEM images of (a) Fe<sub>1</sub>Co-HNC-1000 (un-etched, unmodified  $\text{SiO}_2$ ), (b) Co-HNC-900, and (c) Fe<sub>1</sub>Co@CNFs-900.

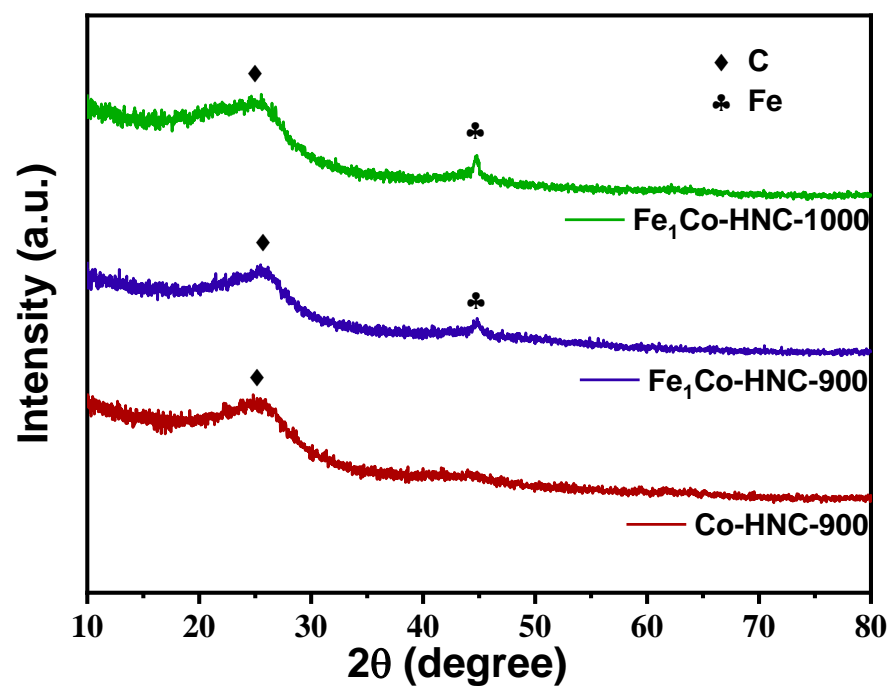

Figure S3. XRD patterns of Co-HNC-900, Fe<sub>1</sub>Co-HNC-900, and Fe<sub>1</sub>Co-HNC-1000.

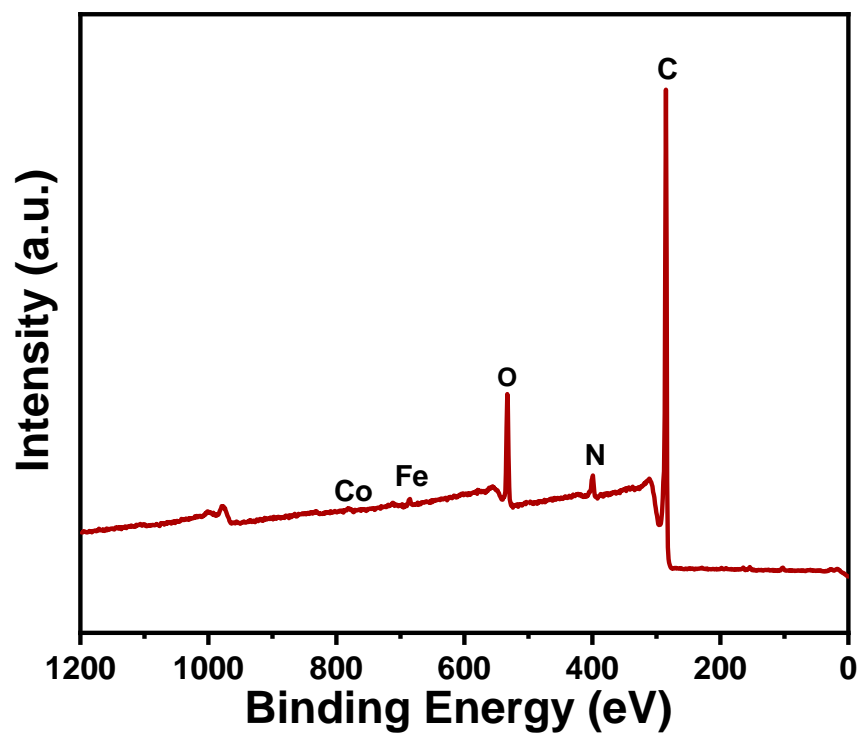

Figure S4. XPS spectra of Fe<sub>1</sub>Co-HNC-1000.

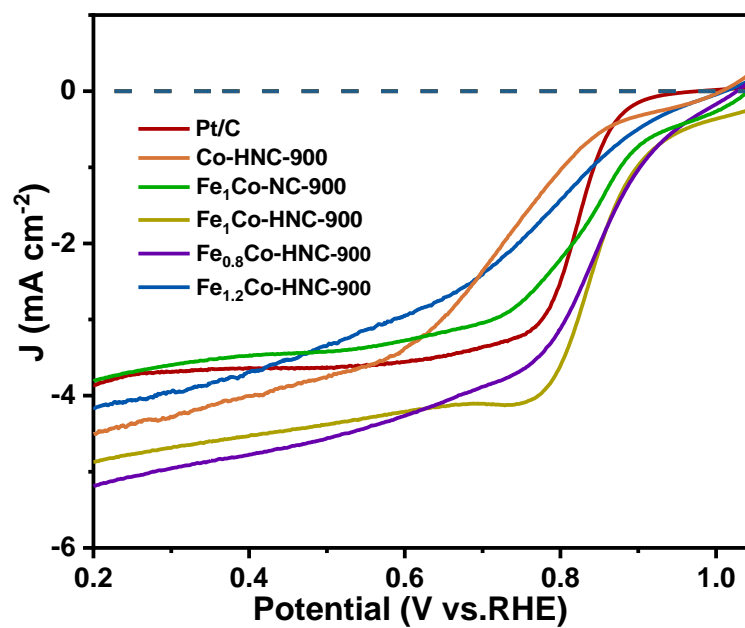

Figure S5. RRDE polarization curves of different electrocatalysts at 1600 rpm. Scan rate is 5 mV/s.

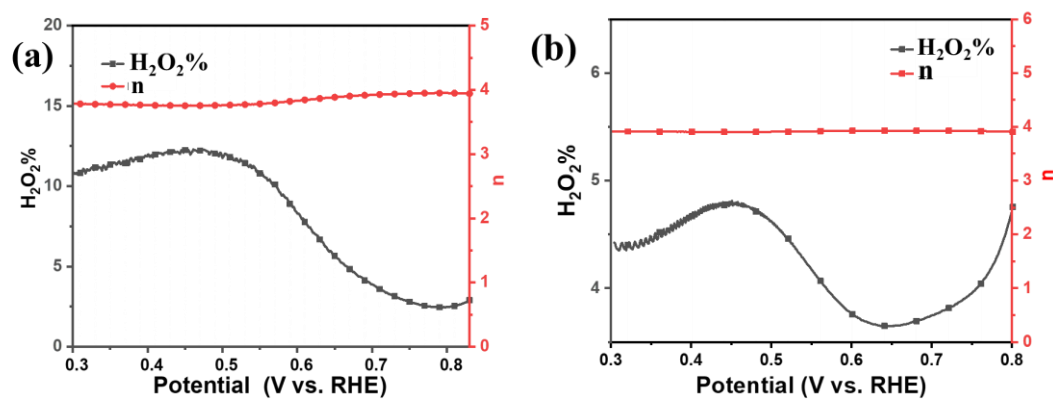

Figure S6.  $\text{H}_2\text{O}_2$  yield and  $n$  of (a)  $\text{Fe}_1\text{Co-HNC-1000}$ , and (b)  $\text{Pt/C}$ .

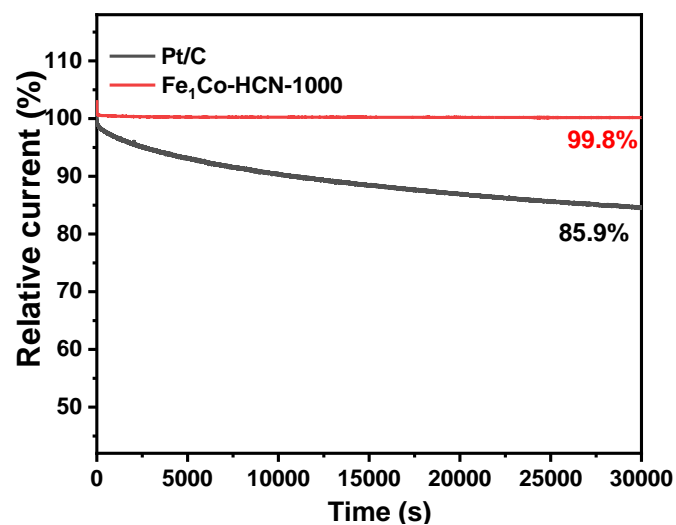

Figure S7. Chronoamperometric curves of Fe<sub>1</sub>Co-HNC-1000 and Pt/C at 0.52 V.

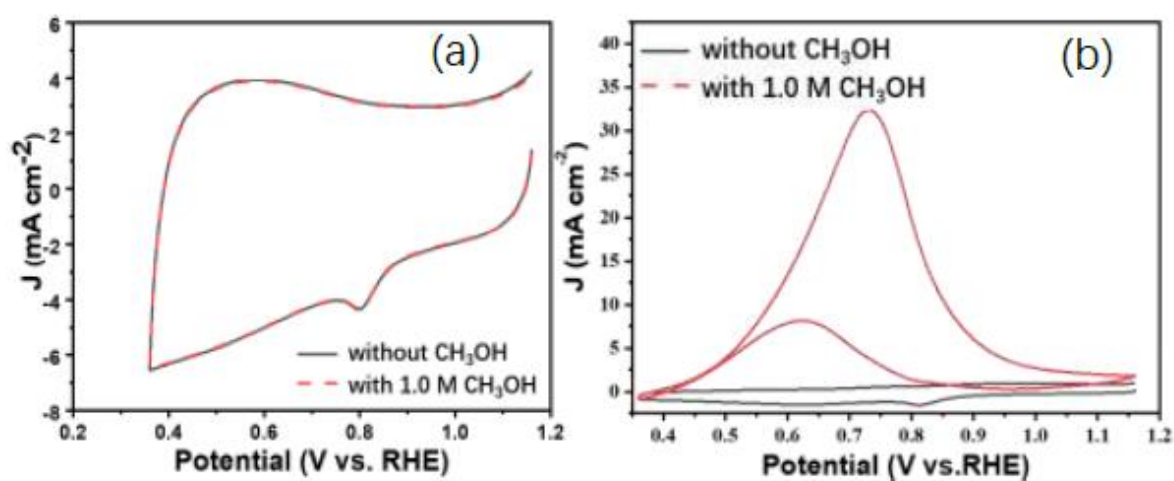

Figure S8. CV curves of (a) Fe<sub>1</sub>Co-HNC-1000, and (b) Pt/C with and without 1.0 M CH<sub>3</sub>OH at O<sub>2</sub>-saturated 0.10 M KOH electrolyte. Scan rate is 5 mV/s.

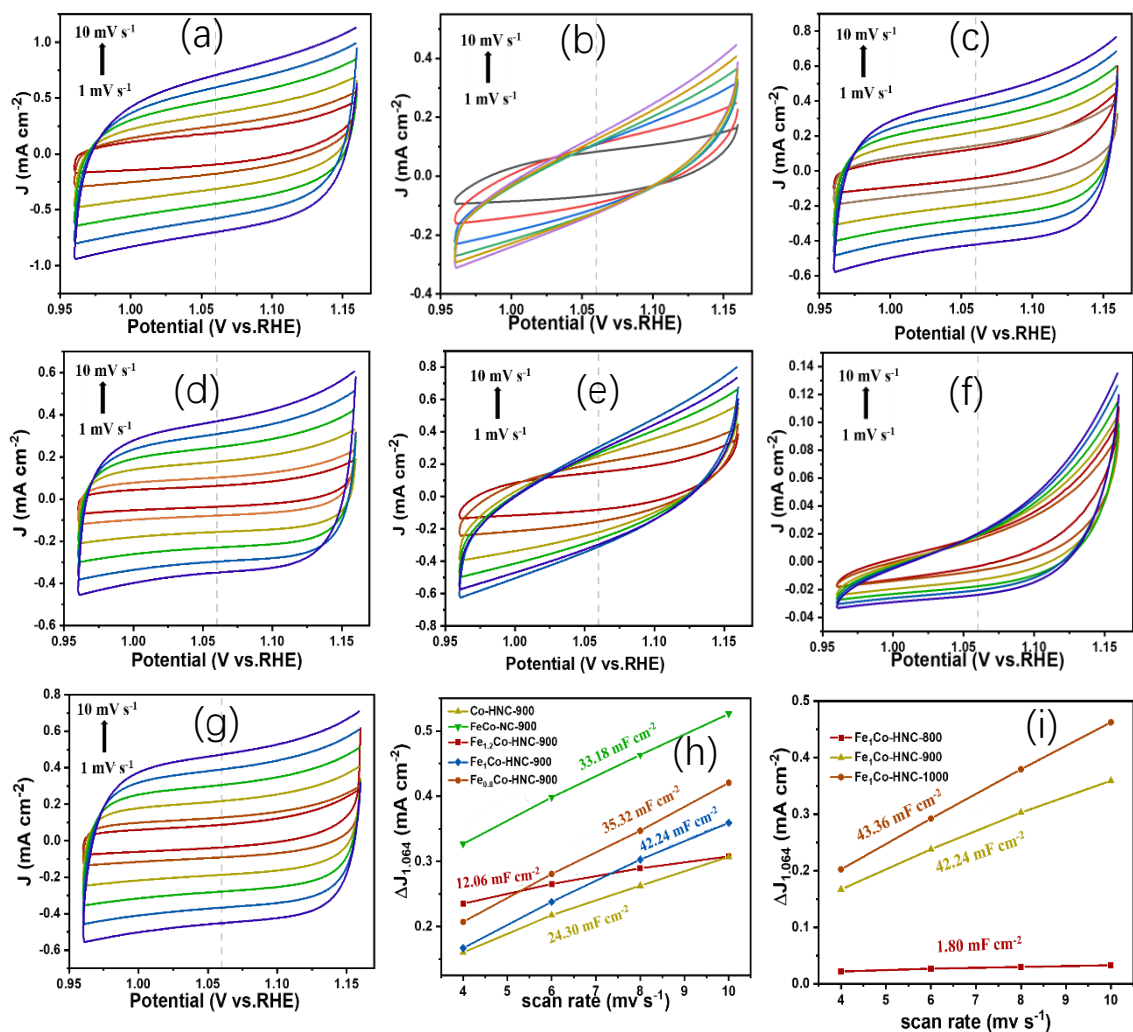

**Figure S9.** (a–g) CV curves of different electrocatalysts in 0.10 M KOH at various scan rate. (a) FeCo-NC-900, (b) Co-HNC-900, (c) Fe<sub>0.8</sub>Co-HNC-900, (d) Fe<sub>1</sub>Co-HNC-900, (e) Fe<sub>1.2</sub>Co-HNC-900, (f) Fe<sub>0.8</sub>Co-HNC-800, and (g) Fe<sub>0.8</sub>Co-HNC-1000. (h, i) Plots of  $\Delta J$  vs. scan rate at 1.064 V (vs. RHE) of different electrocatalysts in 0.10 M KOH.

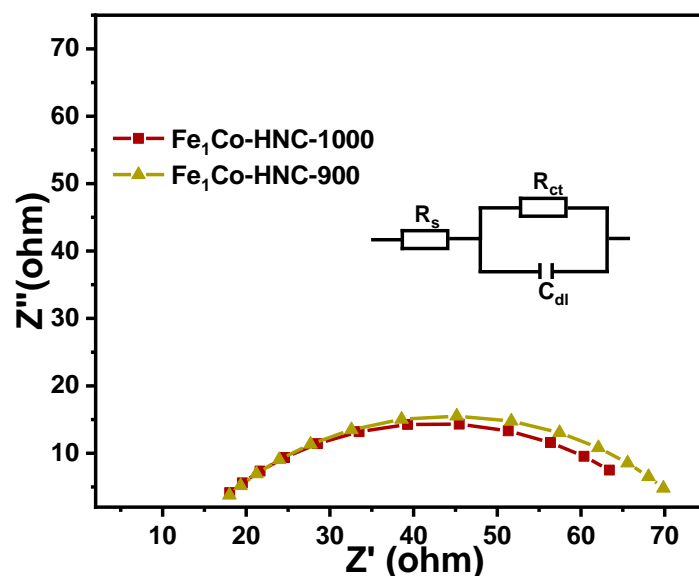

**Figure S10.** EIS of Fe<sub>1</sub>Co-HNC-900 and Fe<sub>1</sub>Co-HNC-1000 in 0.10 M KOH. Frequency range 100 kHz to 0.01 Hz, amplitude 5 mV, potential 0.52 V (vs. RHE).

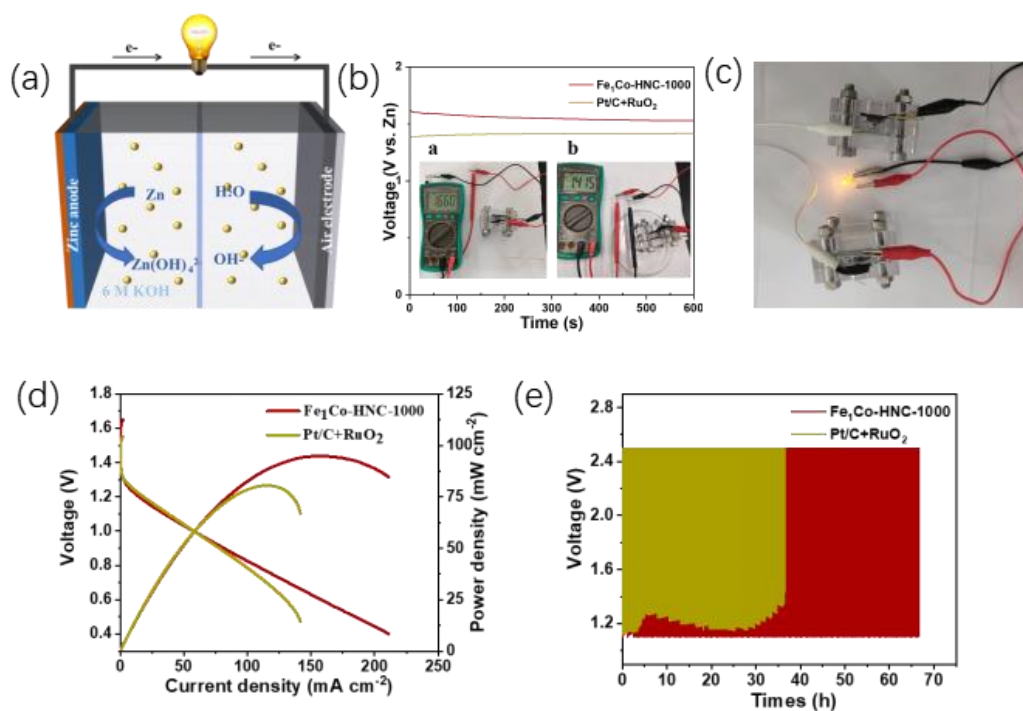

**Figure S11.** Electrochemical performance of the Fe<sub>1</sub>Co-HNC-1000 and commercial Pt/C + RuO<sub>2</sub> mixture catalysts in a zinc-air battery. (a) Schematic illustration of the rechargeable liquid-state zinc-air battery. (b) Open-circuit potential plots (Illustrations: a: Fe<sub>1</sub>Co-HNC-1000 and b: Pt/C+RuO<sub>2</sub> open circuit voltage diagram tested with a multimeter). (c) The photo of a lighted LED powered by two Fe<sub>1</sub>Co-HNC-1000-based zinc-air batteries in series. (d) Discharge polarization curves and power density plots. (e) Galvanostatic charge-discharge cycling curves at 10 mA cm<sup>-1</sup>.

**Table S1.** Metal atom contents of each catalyst tested using MP-AES.

| Catalyst                     | Fe (at.%) | Co (at.%) | Zn (at.%) |
|------------------------------|-----------|-----------|-----------|
| Co-HNC-900                   | -         | 0.008     | 0.27      |
| Fe <sub>1</sub> Co-NC-900    | 0.029     | 0.004     | 2.21      |
| Fe <sub>0.8</sub> Co-HNC-900 | 0.217     | 0.003     | 0.05      |
| Fe <sub>1</sub> Co-HNC-900   | 0.165     | 0.003     | 0.21      |
| Fe <sub>1.2</sub> Co-HNC-900 | 0.261     | 0.003     | 0.22      |
| Fe <sub>1</sub> Co-HNC-1000  | 0.102     | 0.001     | -         |

-: Not detected.

**Table S2.** The elemental content of different samples obtained using XPS.

| Catalyst                     | C (at.%) | N (at.%) | O (at.%) | Zn (at.%) | Fe (at.%) | Co (at.%) |
|------------------------------|----------|----------|----------|-----------|-----------|-----------|
| Fe <sub>1</sub> Co-NC-900    | 78.69    | 9.19     | 10.26    | 1.07      | 0.1       | 0.69      |
| Co-HNC-900                   | 80.39    | 9.66     | 9.01     | 0.31      | -         | 0.63      |
| Fe <sub>0.8</sub> Co-HNC-900 | 83.59    | 6.46     | 9.51     | 0.08      | 0.12      | 0.24      |
| Fe <sub>1</sub> Co-HNC-900   | 85.25    | 6.16     | 8.08     | 0.13      | 0.15      | 0.23      |
| Fe <sub>1.2</sub> Co-HNC-900 | 82.28    | 7.67     | 9.34     | 0.07      | 0.17      | 0.46      |
| Fe <sub>1</sub> Co-HNC-1000  | 85.56    | 4.31     | 9.96     | -         | 0.07      | 0.10      |

-: Not detected.



**Table S3.** Pore parameters of Fe<sub>1</sub>Co-HNC synthesized at different temperatures.

| Catalyst                                    | S <sub>BET</sub><br>(m <sup>2</sup> g <sup>-1</sup> ) | S <sub>mic</sub><br>(m <sup>2</sup> g <sup>-1</sup> ) | V <sub>tot</sub><br>(cm <sup>3</sup> g <sup>-1</sup> ) | Average<br>pore di-<br>ameter<br>(nm) | Average<br>mesopore<br>diameter<br>(nm) |
|---------------------------------------------|-------------------------------------------------------|-------------------------------------------------------|--------------------------------------------------------|---------------------------------------|-----------------------------------------|
| Fe <sub>1</sub> Co-HNC-800                  | 536.89                                                | 313.15                                                | 0.53                                                   | 4.01                                  | 16.50                                   |
| Fe <sub>1</sub> Co-HNC -900                 | 485.76                                                | 212.79                                                | 0.61                                                   | 5.07                                  | 17.25                                   |
| Fe <sub>1</sub> Co-HNC -1000                | 662.33                                                | 316.27                                                | 0.75                                                   | 4.57                                  | 18.70                                   |
| Fe <sub>1</sub> Co-HNC-1000 (Un-<br>etched) | 151.07                                                | 90.89                                                 | 0.142                                                  | 3.77                                  | 14.88                                   |

**Table S4.** Comparison of the ORR activity with different catalysts.

| Catalyst                     | E <sub>onset</sub><br>(V) | E <sub>1/2</sub><br>(V) | J <sub>L</sub><br>(mA cm <sup>-2</sup> ) | C <sub>dl</sub><br>(mF cm <sup>-2</sup> ) |
|------------------------------|---------------------------|-------------------------|------------------------------------------|-------------------------------------------|
| Pt/C                         | 0.95                      | 0.83                    | 3.85                                     |                                           |
| Co-HNC-900                   | 0.89                      | 0.76                    | 4.50                                     | 24.30                                     |
| Fe <sub>1</sub> Co-NC-900    | 0.92                      | 0.84                    | 3.81                                     | 33.18                                     |
| Fe <sub>0.8</sub> Co-HNC-900 | 0.94                      | 0.85                    | 5.18                                     | 35.32                                     |
| Fe <sub>1</sub> Co-HNC-900   | 0.95                      | 0.85                    | 4.87                                     | 42.24                                     |
| Fe <sub>1.2</sub> Co-HNC-900 | 0.95                      | 0.79                    | 4.16                                     | 12.06                                     |
| Fe <sub>1</sub> Co-HNC-800   | 0.94                      | 0.82                    | 3.63                                     | 1.80                                      |
| Fe <sub>1</sub> Co-HNC-1000  | 0.96                      | 0.86                    | 4.72                                     | 43.36                                     |

**Table S5.** Comparison of the potential gap ( $\Delta E$ ) between ORR half-wave potential (<sup>ORR</sup>E<sub>1/2</sub> = 0.86 V) and OER overpotential at 10 mA cm<sup>-2</sup> (<sup>OER</sup>E<sub>j</sub> = 10 mA) of Fe<sub>1</sub>Co-HNC-1000 with recently reported analogous Fe/Co-based electrocatalysts.

| NO. | Name                                           | Category                                                            | ORR<br>(E <sub>1/2</sub> ) (V) | OER<br>(E <sub>j</sub> = 10)<br>(V) | $\Delta E$ (V) | Ref.      |
|-----|------------------------------------------------|---------------------------------------------------------------------|--------------------------------|-------------------------------------|----------------|-----------|
| 1   | Fe/Co/N-C                                      | 3D@graphene<br>FeCo nanoalloys                                      | 0.850                          | -                                   | -              | [1]       |
| 2   | Fe, Co/N-C                                     | encapsulated in<br>N-doped carbon<br>nanofibers                     | 0.860                          | 1.618                               | 0.758          | [2]       |
| 3   | Co <sub>3</sub> Fe <sub>7</sub> @Co/Fe<br>-SAC | N-doped carbon<br>nanofiber net-<br>works                           | 0.841                          | -                                   | -              | [3]       |
| 4   | FeCo-N                                         | 3D multi-layered<br>graphene struc-<br>ture with multi-<br>channels | 0.860                          | 1.620                               | 0.76           | [4]       |
| 5   | Pt/C + RuO <sub>2</sub> /C                     | Precious metal<br>catalysts                                         | 0.830                          | 1.620                               | 0.79           | This work |
| 6   | Fe <sub>1</sub> Co-HNC-<br>1000                | 1D@2D                                                               | 0.860                          | 1.629                               | 0.77           | This work |

-: not provided.

## References

- Xiong J, Chen X, Zhang Y, Lu Y, Liu X, Zheng Y, Lin J, Fe/Co/N-C/graphene derived from Fe/ZIF-67/graphene oxide three dimensional frameworks as a remarkably efficient and stable catalyst for the oxygen reduction reaction[J]. *RSC Advances*, **2022**, 12: 2425.
- Yang W, Guo J, Ma J, Wu N, Xiao J, Wu M, FeCo nanoalloys encapsulated in N-doped carbon nanofibers as a trifunctional catalyst for rechargeable Zn-air batteries and overall water electrolysis[J]. *Journal of Alloys and Compounds*, **2022**, 926: 166937.
- Liu B, Wang S, Feng R, Ni Y, Song F, Liu Q, Anchoring bimetal single atoms and alloys on N-doping-carbon nanofiber networks for an efficient oxygen reduction reaction and zinc-air batteries[J]. *ACS Applied Materials & Interfaces*, **2022**, 14: 38739.
- Ji C, Zhang T, Sun P, Li P, Wang J, Zhang L, Sun Y, Duan W, Li Z, Facile preparation and properties of high nitrogen-containing Fe/Co/N co-doped three-dimensional graphene bifunctional oxygen catalysts for zinc air battery, *International Journal of Hydrogen Energy*, **2023**, 48, 26328–26340.
